# Supplementary material for: Clays enhanced with niobium: potential in wastewater treatment and reuse as pigment with antibacterial activity
Source: publisher site journal article supplement (doi:10.3762/bjnano.16.13), 2025-02-10
Supplement: Additional file 1 [file 2190-4286-16-13-S1.pdf]

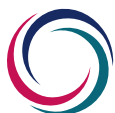

## Supporting Information

for

### **Clays enhanced with niobium: potential in wastewater treatment and reuse as pigment with antibacterial activity**

Silvia Jaerger, Patricia Appelt, Mario Antônio Alves da Cunha, Fabián Ccahuana Ayma, Ricardo Schneider, Carla Bittencourt and Fauze Jacó Anaissi

*Beilstein J. Nanotechnol.* **2025**, *16*, 141–154. [doi:10.3762/bjnano.16.13](https://doi.org/10.3762/bjnano.16.13)

## Additional figures

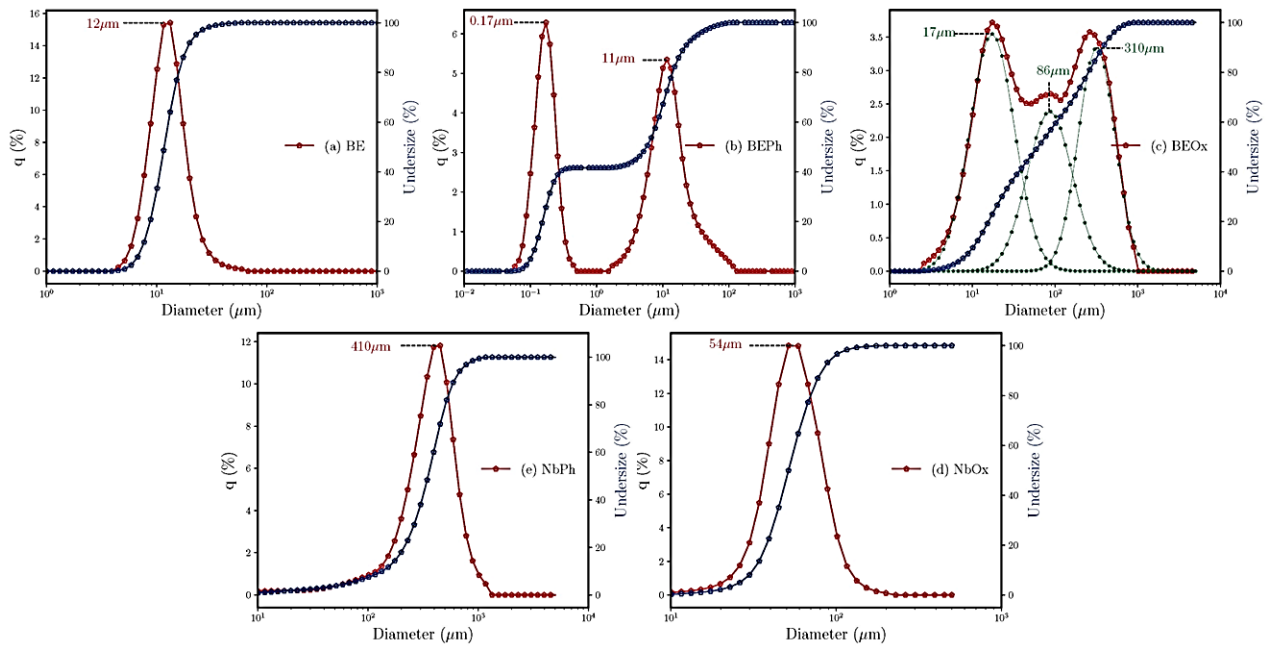

**Figure S1:** Particle size distribution for the samples BE (a), BEPh (b), BEOx (c), NbPh (d), and NbOx (e).

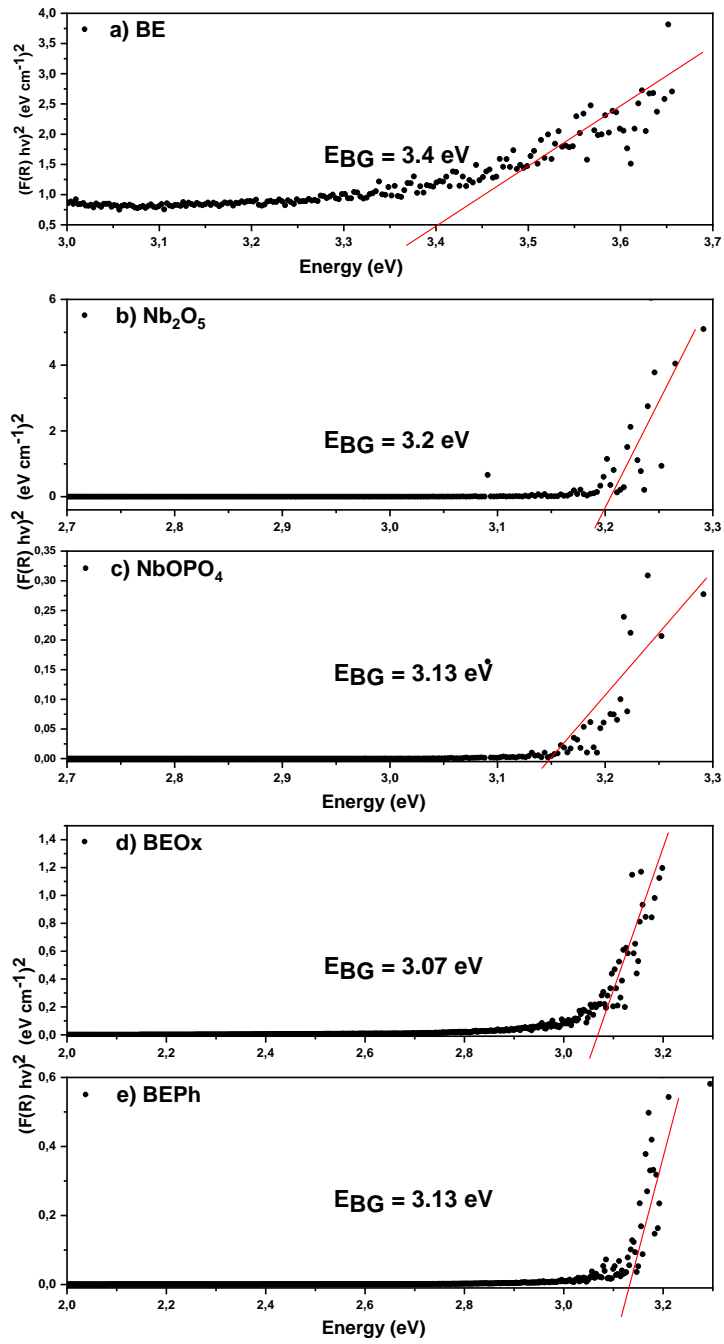

**Figure S2:** Kubelka–Munk spectra of the samples BE (a), Nb<sub>2</sub>O<sub>5</sub> (b), NbOPO<sub>4</sub> (c), BEOx (d), and BEPh (e).

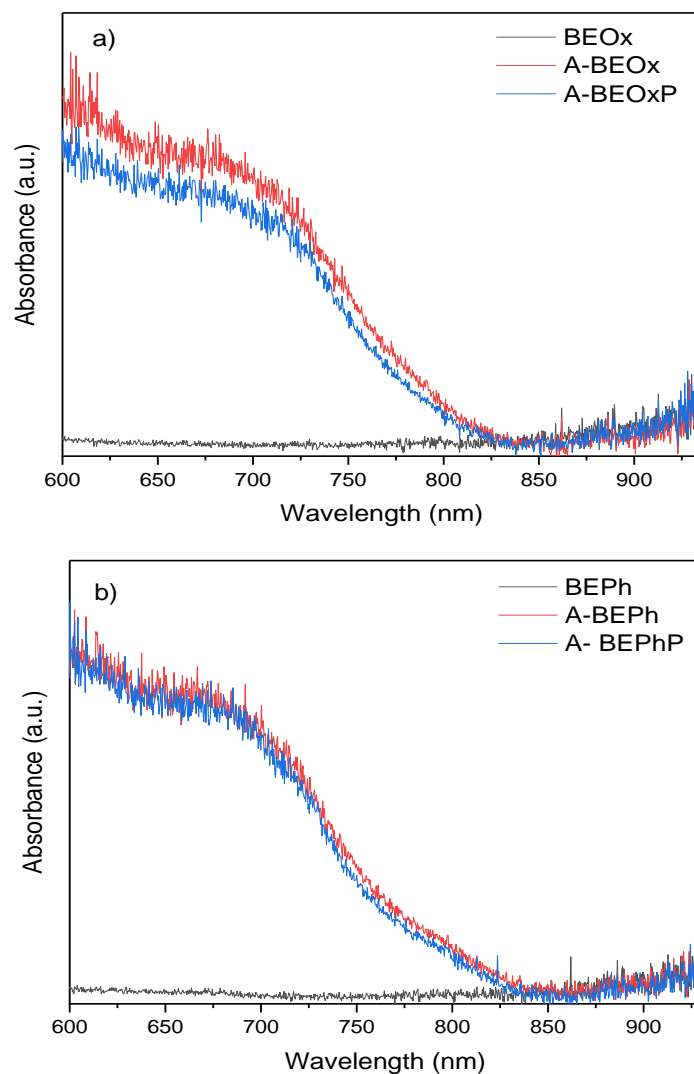

**Figure S3:** Absorbance spectra in the visible region for the bentonite samples modified with niobium oxide (a) and niobium phosphate (b) dispersed in colorless paint.

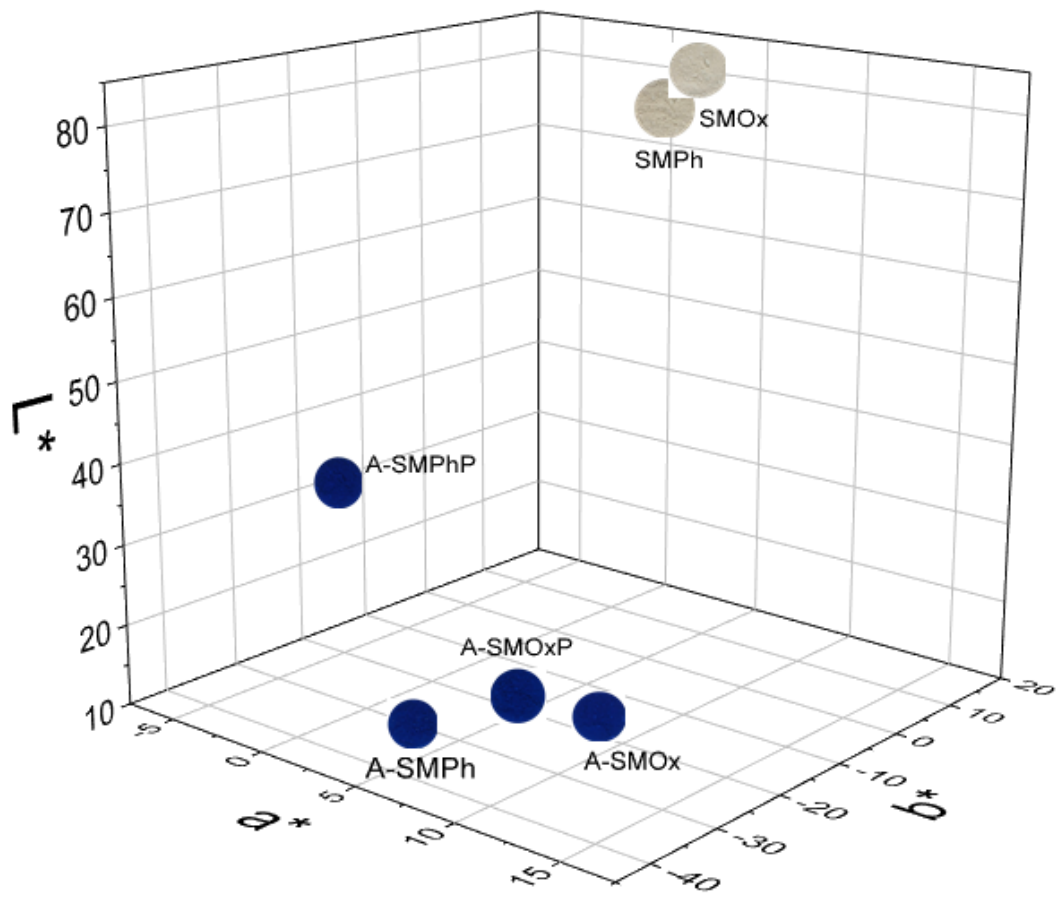

**Figure S4:** A graph of the CIEL\*a\*b\* system highlighting the colorimetric changes of the BEPh and BEOx samples, obtained before and after the adsorption/photocatalysis process of MB in powder form.

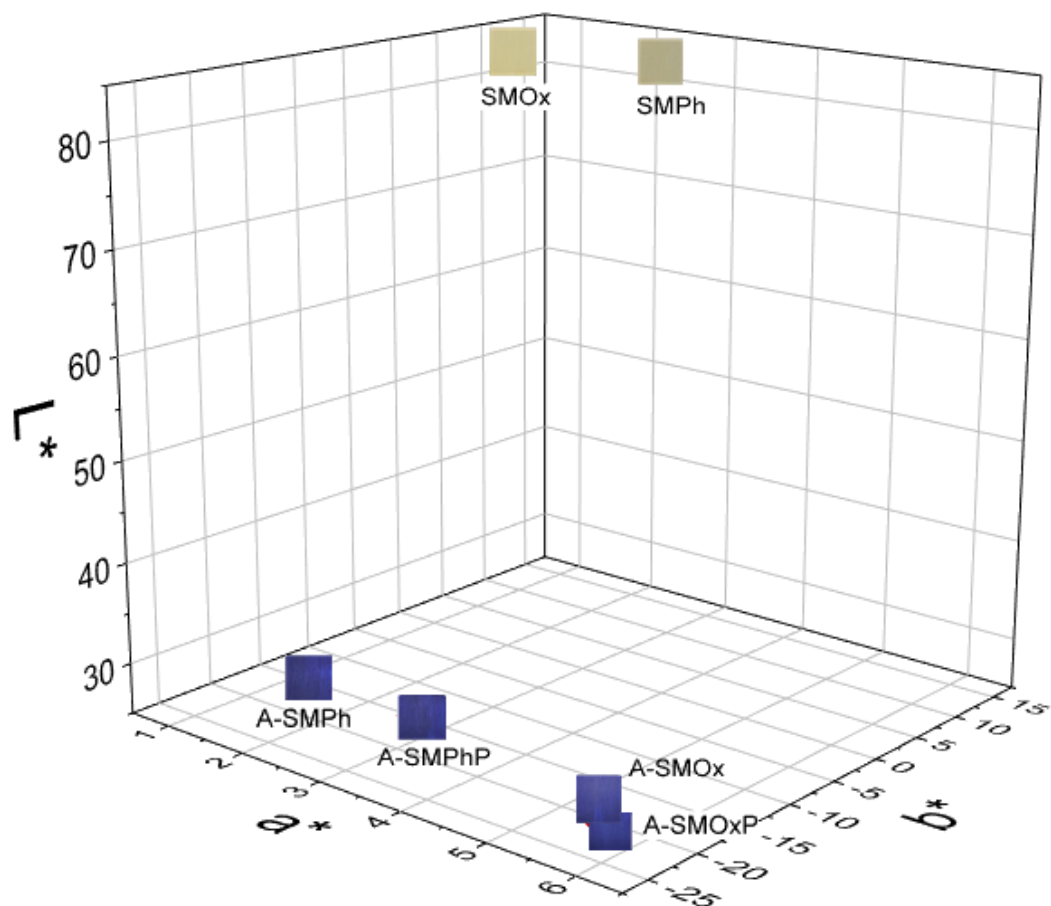

**Figure S5:** A graph of the CIEL\*a\*b\* system highlighting the colorimetric changes of the BEPh and BEOx samples, obtained before and after the adsorption/photocatalysis process of MB as a pigment dispersed in clear paint.
